# Supplementary material
Source: PubMed Central journal article supplement (PMC6648865)
Supplement: ao8b03221_si_001.pdf [file ao8b03221_si_001.pdf]

## Electronic Supplementary Material (ESM)

### Environmentally sustainable synthesis of CoFe<sub>2</sub>O<sub>4</sub>-TiO<sub>2</sub>/rGO ternary photocatalyst: A highly efficient and stable photocatalyst for high production of hydrogen (Solar Fuel)

Hafeez Yusuf Hafeez,<sup>a</sup> Sandeep Kumar Lakhera,<sup>b</sup> Naresh Narayanan,<sup>a,b</sup> Subramaniam Harish,<sup>c</sup> Yasuhiro Hayakawa,<sup>c</sup> Byeong-Kyu Lee,<sup>d</sup> and Bernaurdshaw Neppolian,<sup>\*a</sup>

<sup>a</sup>SRM Research Institute, SRM Institute of Science and Technology, Kattankulathur, Chennai-603203, Tamil Nadu, India.

<sup>b</sup>Department of Physics and Nanotechnology, SRM Institute of Science and Technology, Kattankulathur, Chennai- 603203, Tamil Nadu, India.

<sup>c</sup>Research Institute of Electronics, Shizuoka University, 3-5-1 Johoku, Naka-Ku, Hamamatsu 432-8011, Japan.

<sup>d</sup>Department of Civil and Environmental Engineering, University of Ulsan (UOU), Daehak-ro 93, Nam-gu, Ulsan 44610, South Korea.

## CONTENTS

**Section S1:** Apparent Quantum Yield (AQY) efficiency Calculation

**Figure S1.** FE-SEM images of (a) TiO<sub>2</sub> and (b) CoFe<sub>2</sub>O<sub>4</sub>-TiO<sub>2</sub>/rGO n photocatalysts and (c) EDS pattern and elemental mapping of CoFe<sub>2</sub>O<sub>4</sub>-TiO<sub>2</sub>/rGO photocatalysts

**Figure S2.** Impedance measurement of TiO<sub>2</sub>, CoFe<sub>2</sub>O<sub>4</sub>-TiO<sub>2</sub> and CoFe<sub>2</sub>O<sub>4</sub>-TiO<sub>2</sub>/rGO photocatalysts

**Figure S3.** Photocurrent studies of TiO<sub>2</sub>, CoFe<sub>2</sub>O<sub>4</sub>-TiO<sub>2</sub> and CoFe<sub>2</sub>O<sub>4</sub>-TiO<sub>2</sub>/rGO photocatalysts

**Table S1.** Photocatalytic H<sub>2</sub> production comparison with existing TiO<sub>2</sub> based materials

## Section S1: Apparent Quantum Yield (A.Q.Y) efficiency Calculation

We have calculated the quantum efficiency in order to compare the photocatalytic activity of photocatalysts by using 400 nm band pass filter.

### A.Q.Y Calculation details

The energy of one photon ( $E_{\text{photon}}$ ) with wavelength of  $\lambda_{\text{inc}}$  (nm) is calculated using the following equation.

$$E_{\text{photon}} = \frac{hc}{\lambda_{\text{inc}}}$$

Total energy of the incident light ( $E_{\text{total}}$ )

$$E_{\text{total}} = PSt$$

Therefore,

### Quantum yield (Q.Y.)

$$\text{Q.Y. (\%)} = \frac{\text{Number of reacted electrons}}{\text{Number of incident photons}} \times 100$$

Or

$$\text{A.Q.Y (\%)} = \frac{2 \times (\text{Number of H}_2 \text{ molecules evolved})}{\text{Number of incident photons}} \times 100$$

$$\text{A.Q.Y (\%)} = \frac{2 \times M \times N_A \times h \times c}{P \times S \times t \times \lambda_{\text{inc}}} \times 100$$

Where

$M$  = Amount of hydrogen produced in  $\frac{\text{mol}}{\text{time}} = 2732 \mu\text{mol/h}$

$N_A$  = Avogadro Number =  $6.022 \times 10^{23}$

$c$  = Speed of light =  $3 \times 10^8 \text{ ms}^{-2}$

$h$  = Planck's constant =  $6.626 \times 10^{-34} \text{ Js}$

$P$  = Power density of the incident monochromatic light =  $100 \text{ mW/cm}^2$

$S$  = Irradiated area to produce  $M$  (mol) of hydrogen =  $35 \text{ cm}^2$

$t$  = Irradiated time =  $1 \text{ h} = 3600 \text{ s}$

$\lambda_{\text{inc}}$  = wavelength of the incident monochromatic light =  $400 \text{ nm} = 400 \times 10^{-9} \text{ m}$

$$\text{A.Q.Y (\%)} = \frac{2 \times 2732 \times 10^{-6} \times 6.022 \times 10^{23} \times 6.626 \times 10^{-34} \times 3 \times 10^8}{100 \times 10^{-3} \times 35 \times 3600 \times 400 \times 10^{-9}} \times 100$$

$$\text{A.Q.Y (\%)} = 12.97 \%$$

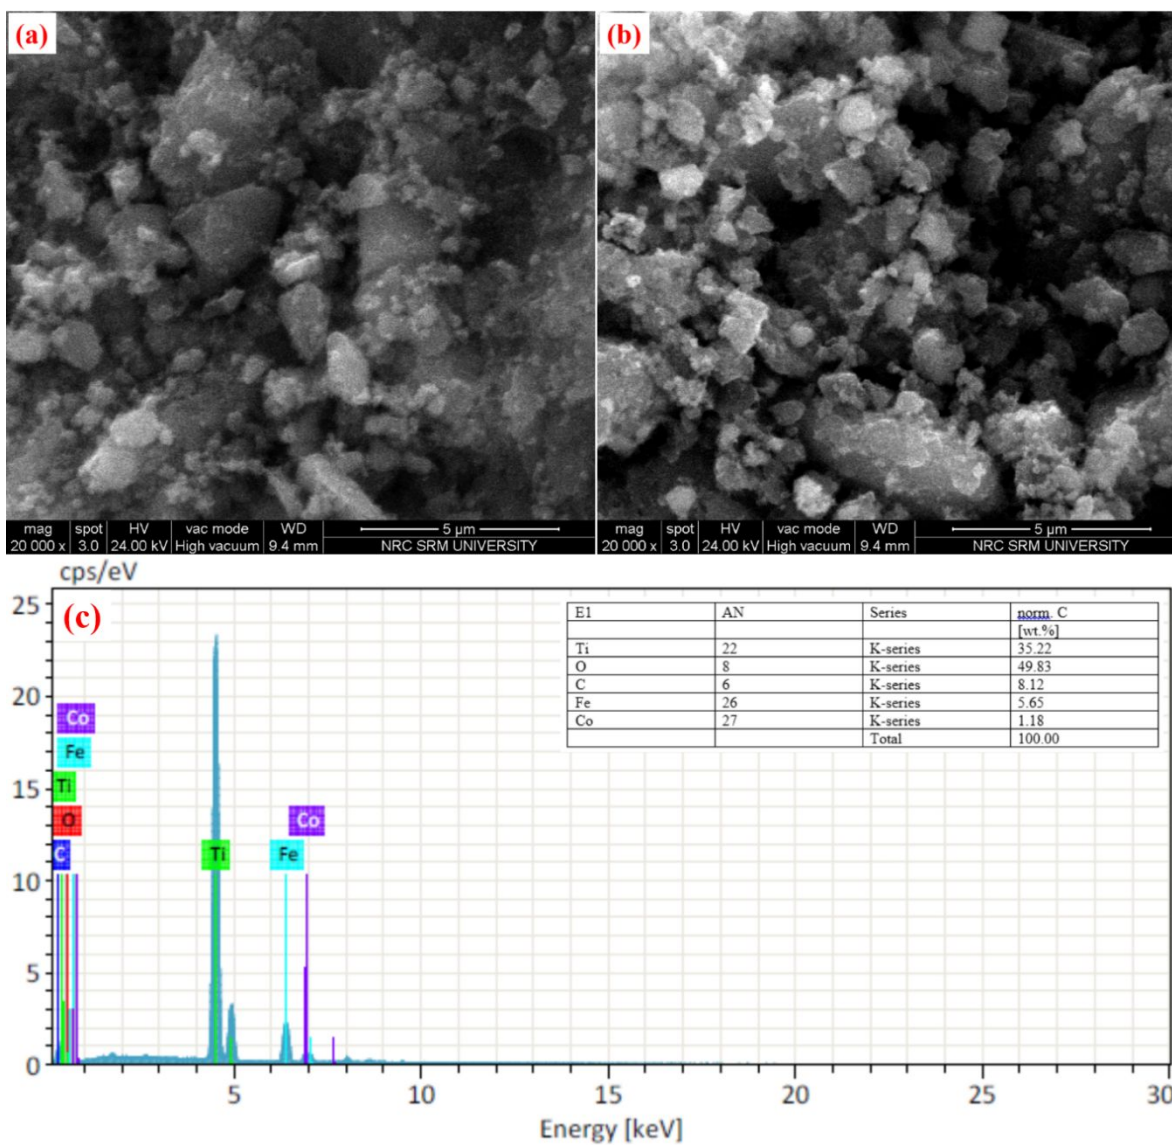

Figure S1. FE-SEM images of (a)  $\text{TiO}_2$  and (b)  $\text{CoFe}_2\text{O}_4\text{-TiO}_2/\text{rGO}$  photocatalysts and (c) EDS pattern and elemental mapping of  $\text{CoFe}_2\text{O}_4\text{-TiO}_2/\text{rGO}$  photocatalyst

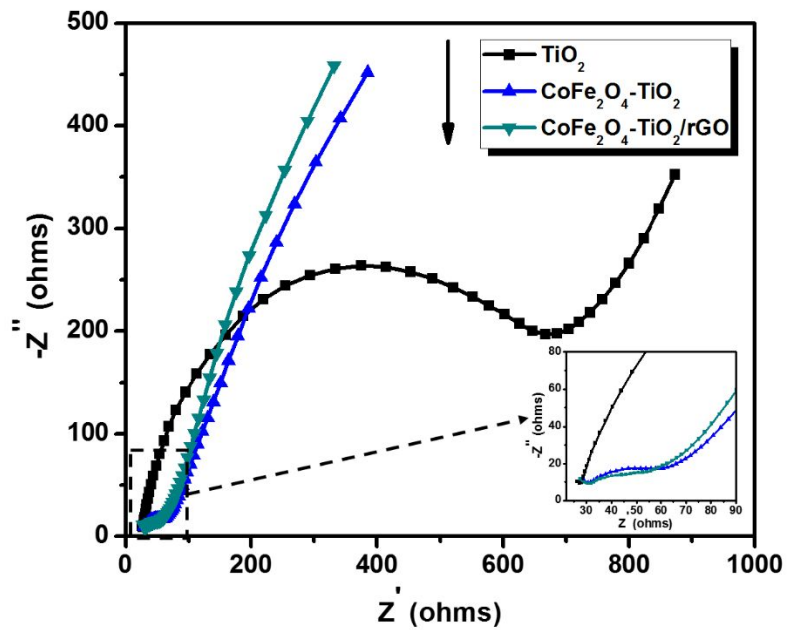

Figure S2. Impedance measurement of  $\text{TiO}_2$ ,  $\text{CoFe}_2\text{O}_4\text{-TiO}_2$  and  $\text{CoFe}_2\text{O}_4\text{-TiO}_2/\text{rGO}$  photocatalysts

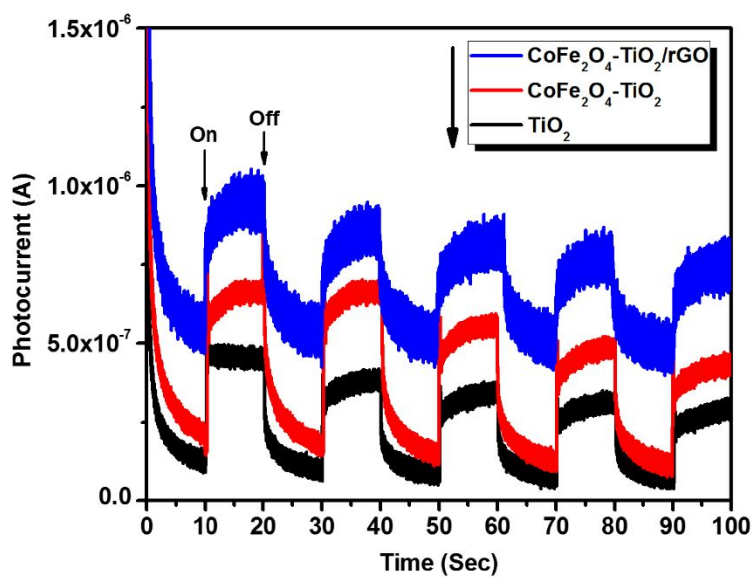

Figure S3. Photocurrent studies of  $\text{TiO}_2$ ,  $\text{CoFe}_2\text{O}_4\text{-TiO}_2$  and  $\text{CoFe}_2\text{O}_4\text{-TiO}_2/\text{rGO}$  photocatalysts

**Table S1 Photocatalytic H<sub>2</sub> production comparison with existing TiO<sub>2</sub> based materials**

| <b>Photocatalysts</b>  | <b>Co-catalysts</b>                      | <b>Hole Scavengers</b>                              | <b>Irradiation Source</b> | <b>H<sub>2</sub> production (μmol g<sup>-1</sup>h<sup>-1</sup>)</b> | <b>Ref (year)</b> |
|------------------------|------------------------------------------|-----------------------------------------------------|---------------------------|---------------------------------------------------------------------|-------------------|
| TiO <sub>2</sub>       | CuFe <sub>2</sub> O <sub>4</sub> /rGO    | Glycerol                                            | 250 W Xe                  | 35981                                                               | [1]<br>(2018)     |
| TiO <sub>2</sub>       | MWT/rGO                                  | Glycerol                                            | 250 W Xe                  | 29000                                                               | [2]<br>(2019)     |
| TiO <sub>2</sub>       | Ni(OH) <sub>2</sub>                      | Glycerol                                            | 300 Xe Lamp               | 4719                                                                | [3]<br>(2018)     |
| TiO <sub>2</sub>       | NiS                                      | Methanol                                            | 300 Xe Lamp               | 655                                                                 | [4]<br>(2018)     |
| TiO <sub>2</sub>       | Ni(HCO <sub>3</sub> ) <sub>2</sub>       | Methanol                                            | 300 Xe Lamp               | 1798                                                                | [5]<br>(2017)     |
| TiO <sub>2</sub>       | Cu <sub>x</sub> S                        | Methanol                                            | 300 Xe Lamp               | 5620                                                                | [6]<br>(2018)     |
| TiO <sub>2</sub>       | ZrCO <sub>2</sub> /rGO                   | Glycerol                                            | Solar light               | 7773                                                                | [7]<br>(2018)     |
| TiO <sub>2</sub>       | CuS                                      | Na <sub>2</sub> SO <sub>3</sub> & Na <sub>2</sub> S | 300 Xe Lamp               | 1262                                                                | [8]<br>(2018)     |
| TiO <sub>2</sub>       | CdS                                      | Na <sub>2</sub> SO <sub>3</sub> & Na <sub>2</sub> S | 300 Xe Lamp               | 1048                                                                | [9]<br>(2017)     |
| TiO <sub>2</sub>       | CuOCr <sub>2</sub> O <sub>3</sub>        | Glycerol                                            | Solar light               | 70400                                                               | [10]<br>(2018)    |
| TiO <sub>2</sub>       | Bi <sub>2</sub> O <sub>3</sub>           | Glycerol                                            | Solar light               | 26020                                                               | [11]<br>(2017)    |
| TiO <sub>2</sub>       | Cu <sub>2</sub> O/rGO                    | Glycerol                                            | 300 Xe Lamp               | 110 968                                                             | [12]<br>(2015)    |
| TiO <sub>2</sub>       | InVO <sub>4</sub> /rGO                   | Glycerol                                            | 250 Xe Lamp               | 33980                                                               | [13]<br>(2019)    |
| <b>TiO<sub>2</sub></b> | <b>CoFe<sub>2</sub>O<sub>4</sub>/rGO</b> | <b>Glycerol</b>                                     | <b>250 Xe Lamp</b>        | <b>76559</b>                                                        | <b>This</b>       |

|  |  |  |  |  |             |
|--|--|--|--|--|-------------|
|  |  |  |  |  | <b>Work</b> |
|--|--|--|--|--|-------------|

## REFERENCES

- (1) H. Y. Hafeez , S. K. Lakhera , P. Karthik, M. Anpo and B. Neppolian. Facile construction of ternary CuFe<sub>2</sub>O<sub>4</sub>-TiO<sub>2</sub> nanocomposite supported reduced graphene oxide (rGO) photocatalysts for the efficient Hydrogen production. *Appl. Sur. Sci.* **2018**, 449, 772-779.
- (2) S. Bellamkonda, N. Thangavel, H. Y. Hafeez, B. Neppolian and G. R. Rao. Highly active and stable multi-walled carbon nanotubes-graphene-TiO<sub>2</sub> nanohybrid: An efficient non-noble metal photocatalyst for water splitting. *Catal. Today*, **2019**, 321–322, 120-127.
- (3) N. L. Reddy, K. K. Cheralathan, V. D. Kumari, B. Neppolian and M. V. Shankar. Photocatalytic Reforming of Biomass Derived Crude Glycerol in Water: A Sustainable Approach for Improved Hydrogen Generation Using Ni(OH)<sub>2</sub> Decorated TiO<sub>2</sub> Nanotubes under Solar Light Irradiation. *ACS Sustainable Chem. Eng.* **2018**, 6, 3754-3764.
- (4) Feiyan Xu, Liuyang Zhang, Bei Cheng, and Jianguo Yu. Direct Z-Scheme TiO<sub>2</sub>/NiS Core–Shell Hybrid Nanofibers with Enhanced Photocatalytic H<sub>2</sub>-Production Activity. *ACS Sustainable Chem. Eng.*, **2018**, 6, 12291-12298.
- (5) Yi Wei, Gang Cheng, Jinyan Xiong, Feifan Xu, and Rong Chen. Positive Ni(HCO<sub>3</sub>)<sub>2</sub> as a Novel Cocatalyst for Boosting the Photocatalytic Hydrogen Evolution Capability of Mesoporous TiO<sub>2</sub> Nanocrystals. *ACS Sustainable Chem. Eng.* **2017**, 5, 5027-5038.
- (6) Haifeng Dang, Zhiyu Cheng, Wei Yang, Wei Chen, Weiqing Huang, Baoqing Li, Zhisheng Shi, Yongfu Qiu, Xinfu Dong and Hongbo Fan. Room-temperature synthesis of Cu<sub>x</sub>S (x=1 or 2) co-modified TiO<sub>2</sub> nanocomposite and its highly efficient photocatalytic H<sub>2</sub> production activity. *J. Alloys. Comp.* **2017**, 709, 422-430.
- (7) N. Subha, M. Mahalakshmi, M. Myilsamy, N. Lakshmana Reddy, M. V. Shankar, B. Neppolian and V. Murugesan. Effective excitons separation on graphene supported ZrO<sub>2</sub>-TiO<sub>2</sub> heterojunction for enhanced H<sub>2</sub> production under solar light. *Int. J. Hydrogen Energy*, **2018**, 43, 3905-3919.
- (8) Moumita Chandra, Kousik Bhunia, and Debabrata Pradhan. Controlled Synthesis of CuS/TiO<sub>2</sub> Heterostructured Nanocomposites for Enhanced Photocatalytic Hydrogen Generation through Water Splitting. *Inorg. Chem.*, **2018**, 57, 4524-4533.

- (9) Jimin Dua, Huiming Wanga, Mengke Yanga, Kaidi Lia, Lixin Zhao, Guoyan Zhao, Sujuan Lia, Xiaolei Gu, Yalan Zhou, Le Wang, Yating Gao and Weimin Wanga and Dae Joon Kang. Pyramid-like CdS nanoparticles grown on porous TiO<sub>2</sub> monolith: An advanced photocatalyst for H<sub>2</sub> production. *Electrochimica Acta*, **2017**, 250, 99-107.
- (10) P Ravi, V Navakoteswara Rao, MV Shankar, M Sathish. CuO/Cr<sub>2</sub>O<sub>3</sub> core-shell structured co-catalysts on TiO<sub>2</sub> for efficient photocatalytic water splitting using direct solar light. *Int. J. Hydrogen Energy*, **2018**, 43, 3976-3987.
- (11) N. Lakshmana Reddy, S. Emin , M. Valant and M.V. Shankar. Nanostructured Bi<sub>2</sub>O<sub>3</sub>@TiO<sub>2</sub> photocatalyst for enhanced hydrogen production. *Int. J. Hydrogen Energy*, 2017, 42, 6627-6636.
- (12) S. G. Babu, R. Vinoth, D. P. Kumar, M. V. Shankar, H. L. Chou, K. Vinodgopal and B. Neppolian. Influence of electron storing, transferring and shuttling assets of reduced graphene oxide at the interfacial copper doped TiO<sub>2</sub> p–n heterojunction for increased hydrogen production. *Nanoscale*, **2015**, 7, 7849-7857.
- (13) H. Y. Hafeez, S. K. Lakhera, M. Ashokkumar and B. Neppolian. Ultrasound assisted synthesis of reduced graphene oxide (rGO) supported InVO<sub>4</sub>-TiO<sub>2</sub> nanocomposite for efficient Hydrogen production. *Ultrason. Sonochem.* **2019** (In press), DOI: 10.1016/j.ultsonch.2018.12.009.
